# Supplementary material for: Evaluation of Osteogenic Potentials of Titanium Dioxide Nanoparticles with Different Sizes and Shapes
Source: Hindawi journal article supplement (doi:10.1155/2020/8887323), 2020-11-11
Supplement: f1 [file 8887323.f1.zip]

Archive with 3 entries (3 files):
- 8887323.f1.tif
- 8887323.f2.tif
- 8887323.f3.tif
