# Supplementary figures and images for: Evaluation of Osteogenic Potentials of Titanium Dioxide Nanoparticles with Different Sizes and Shapes
Source: Hindawi journal article supplement (doi:10.1155/2020/8887323), 2020-11-11

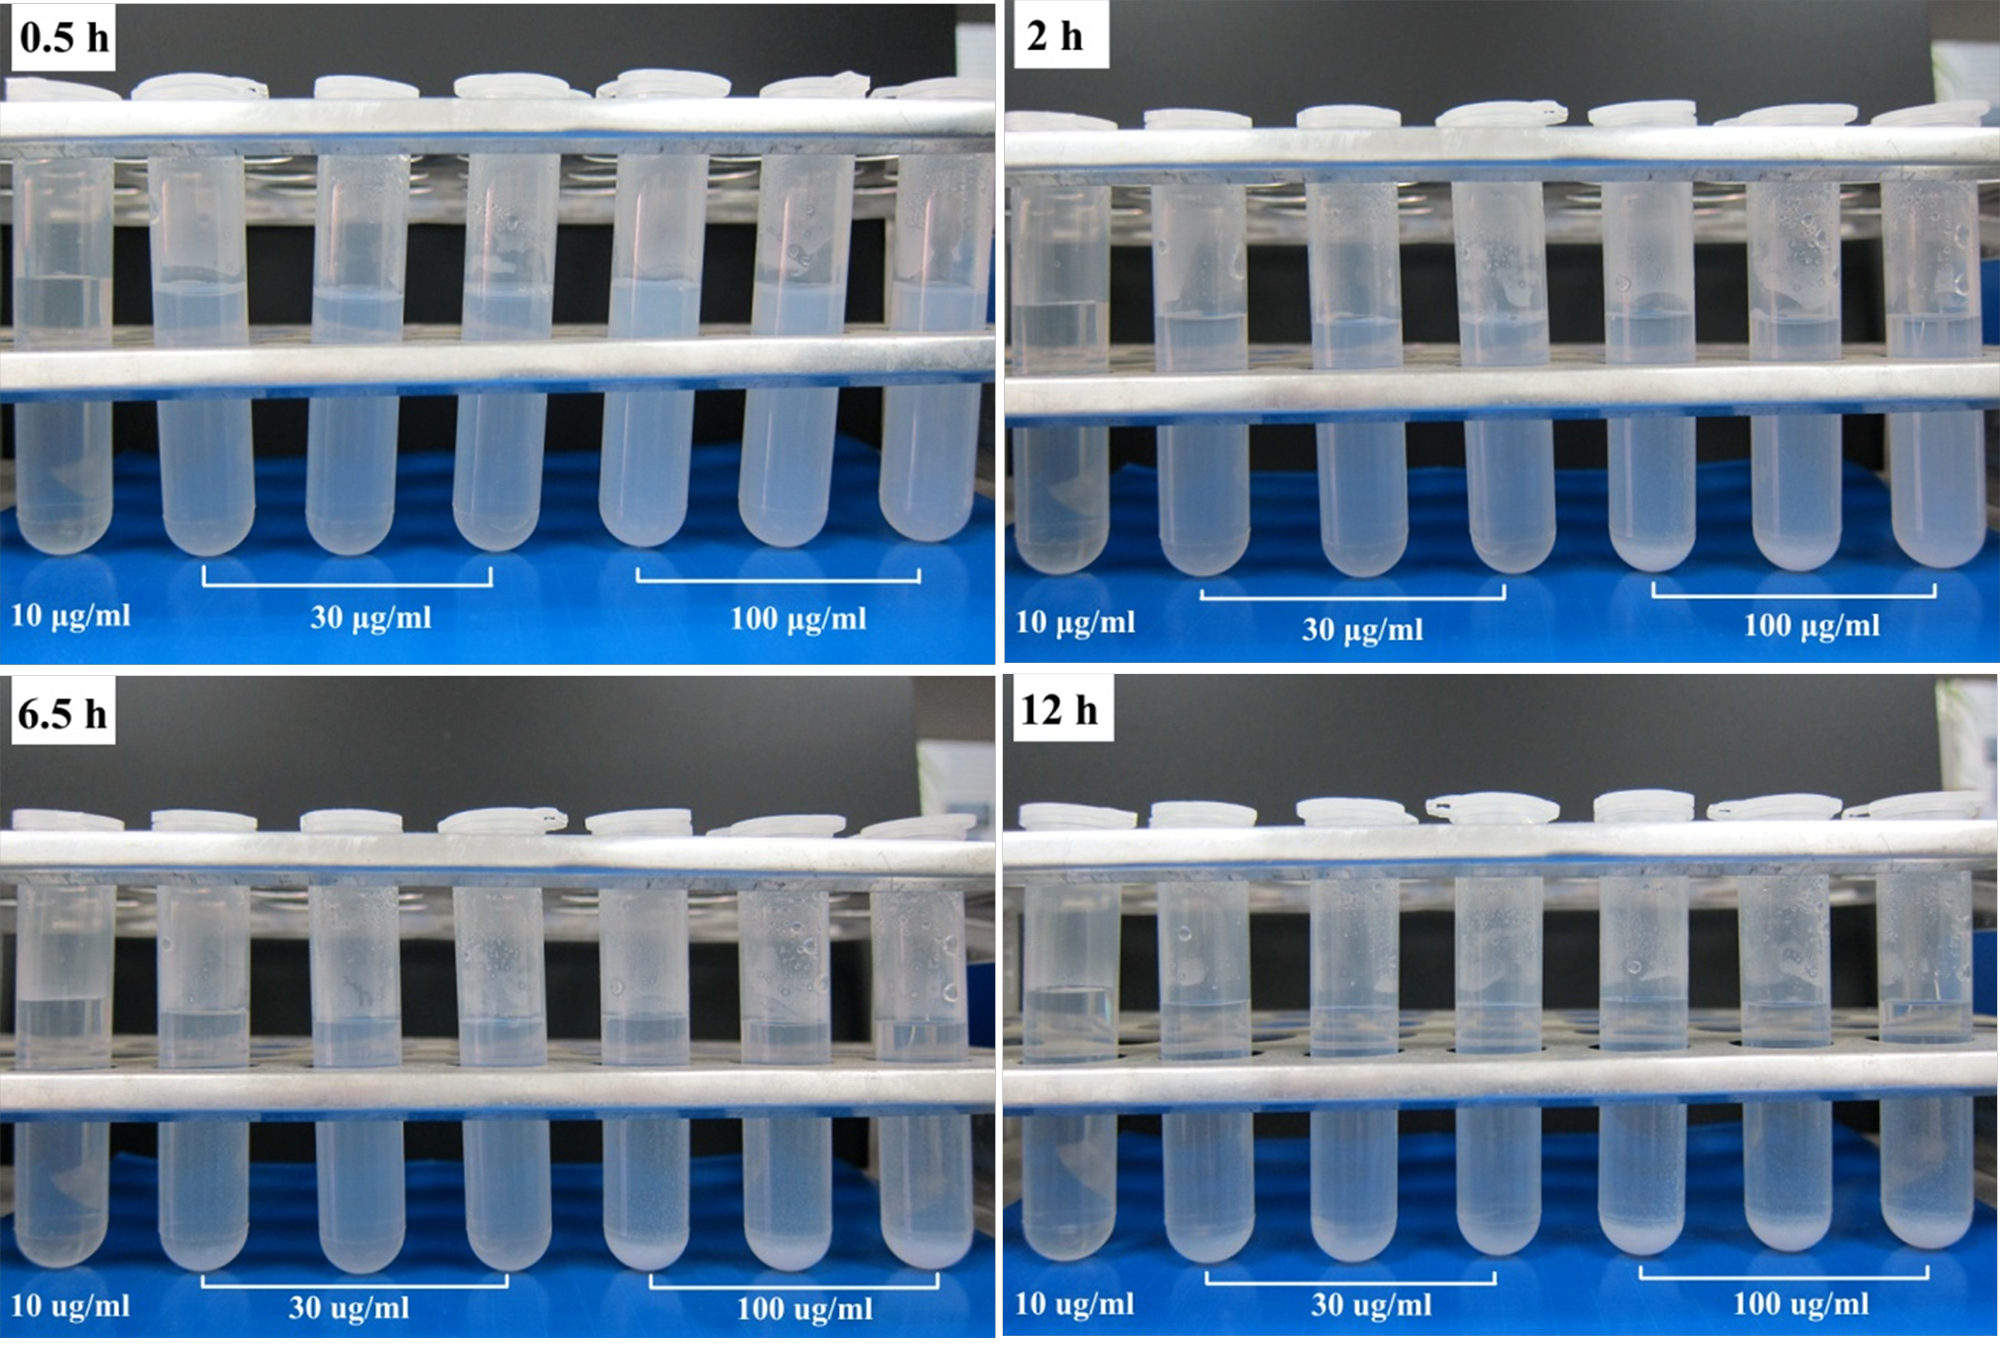

Supplement: f1 [file 8887323.f1.zip › 8887323.f1.tif]

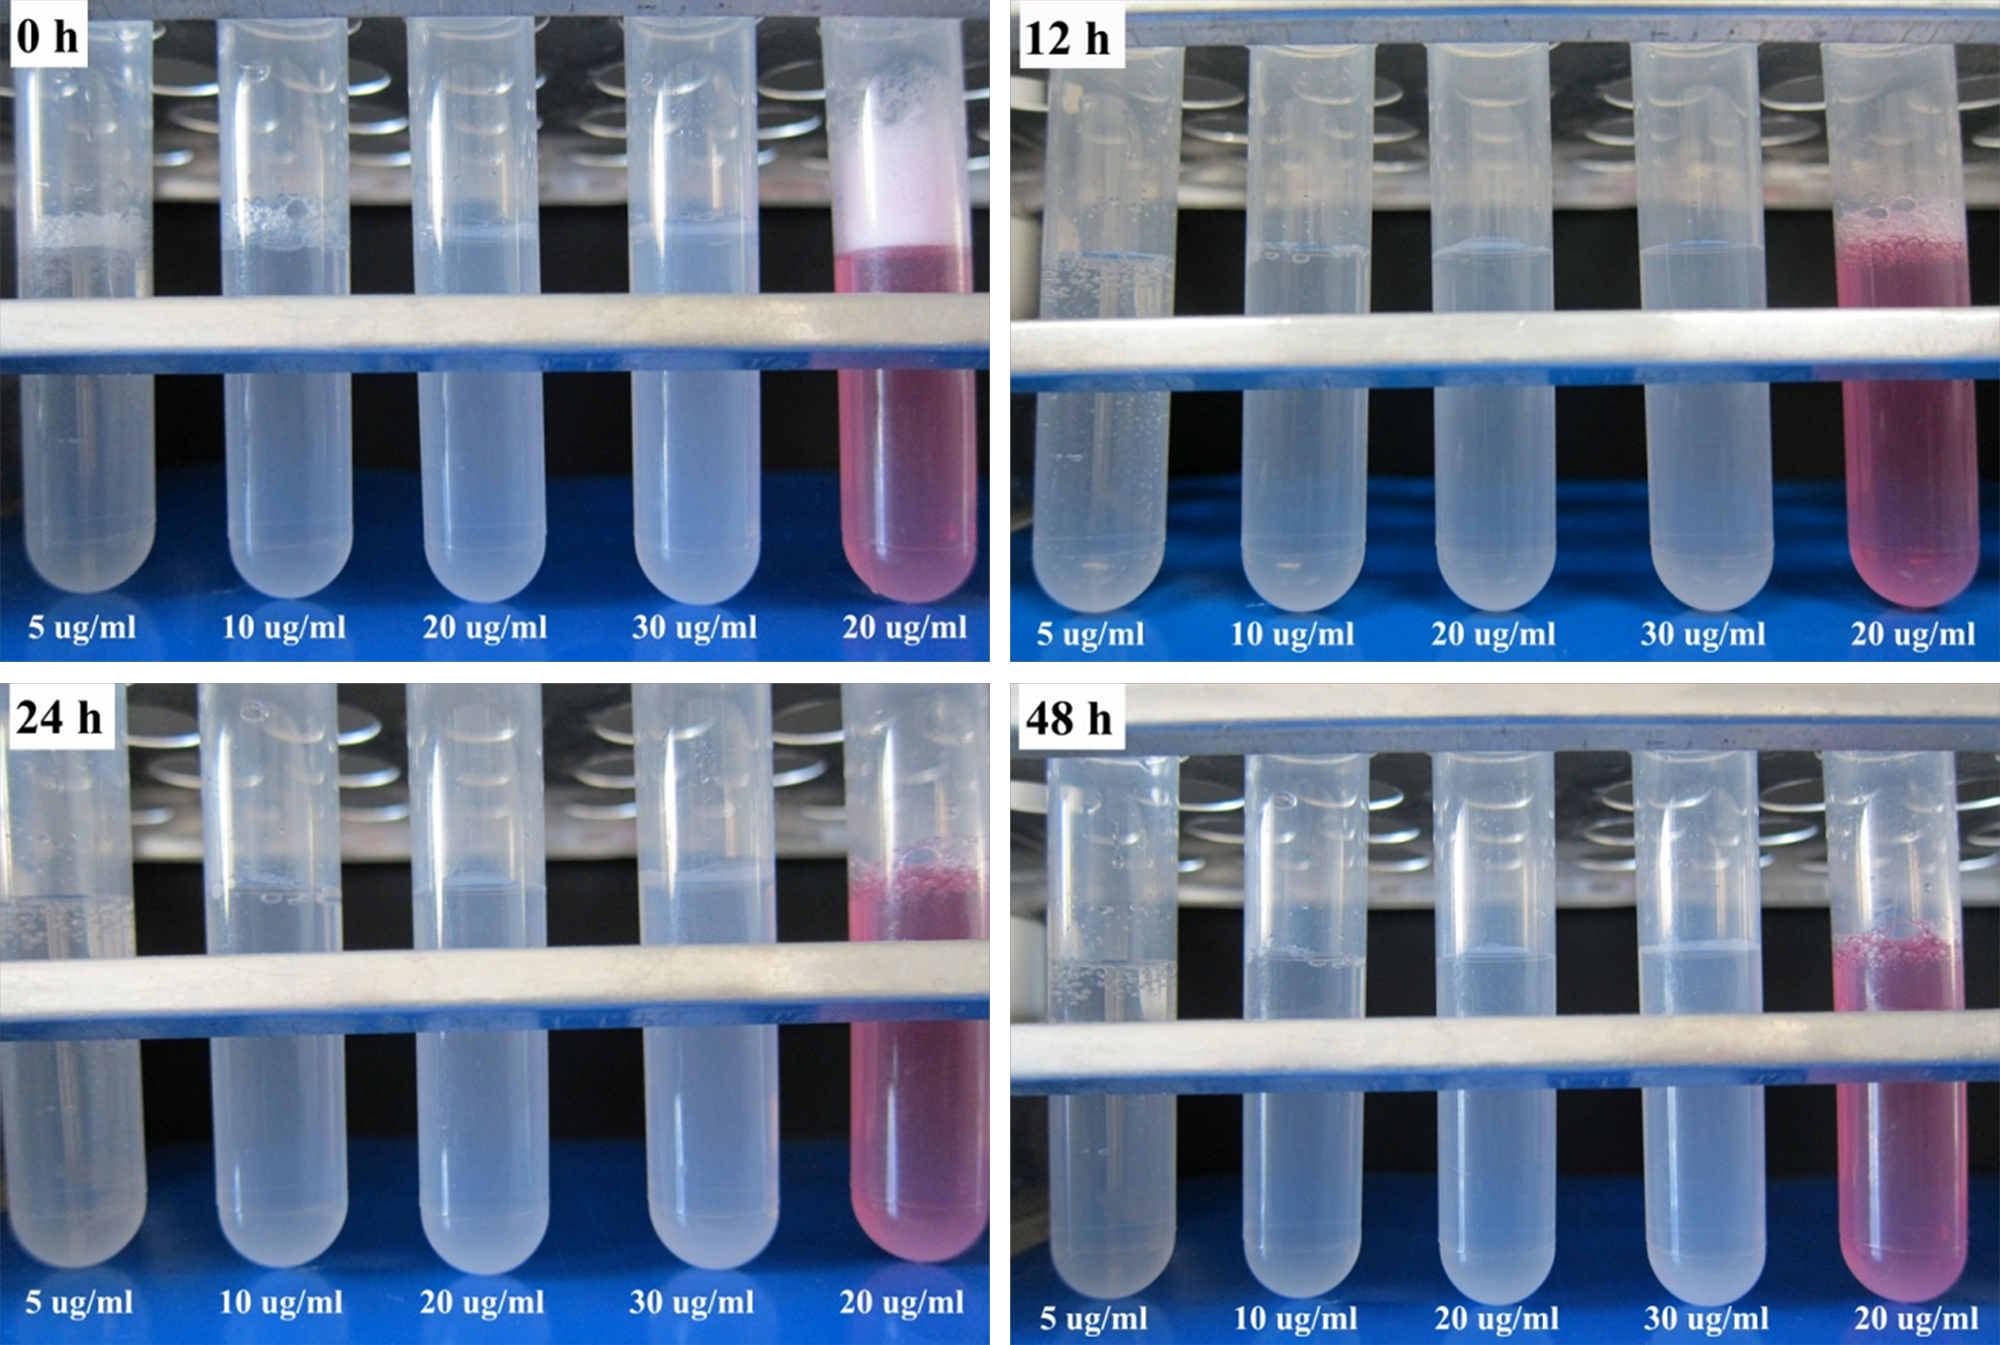

Supplement: f1 [file 8887323.f1.zip › 8887323.f2.tif]

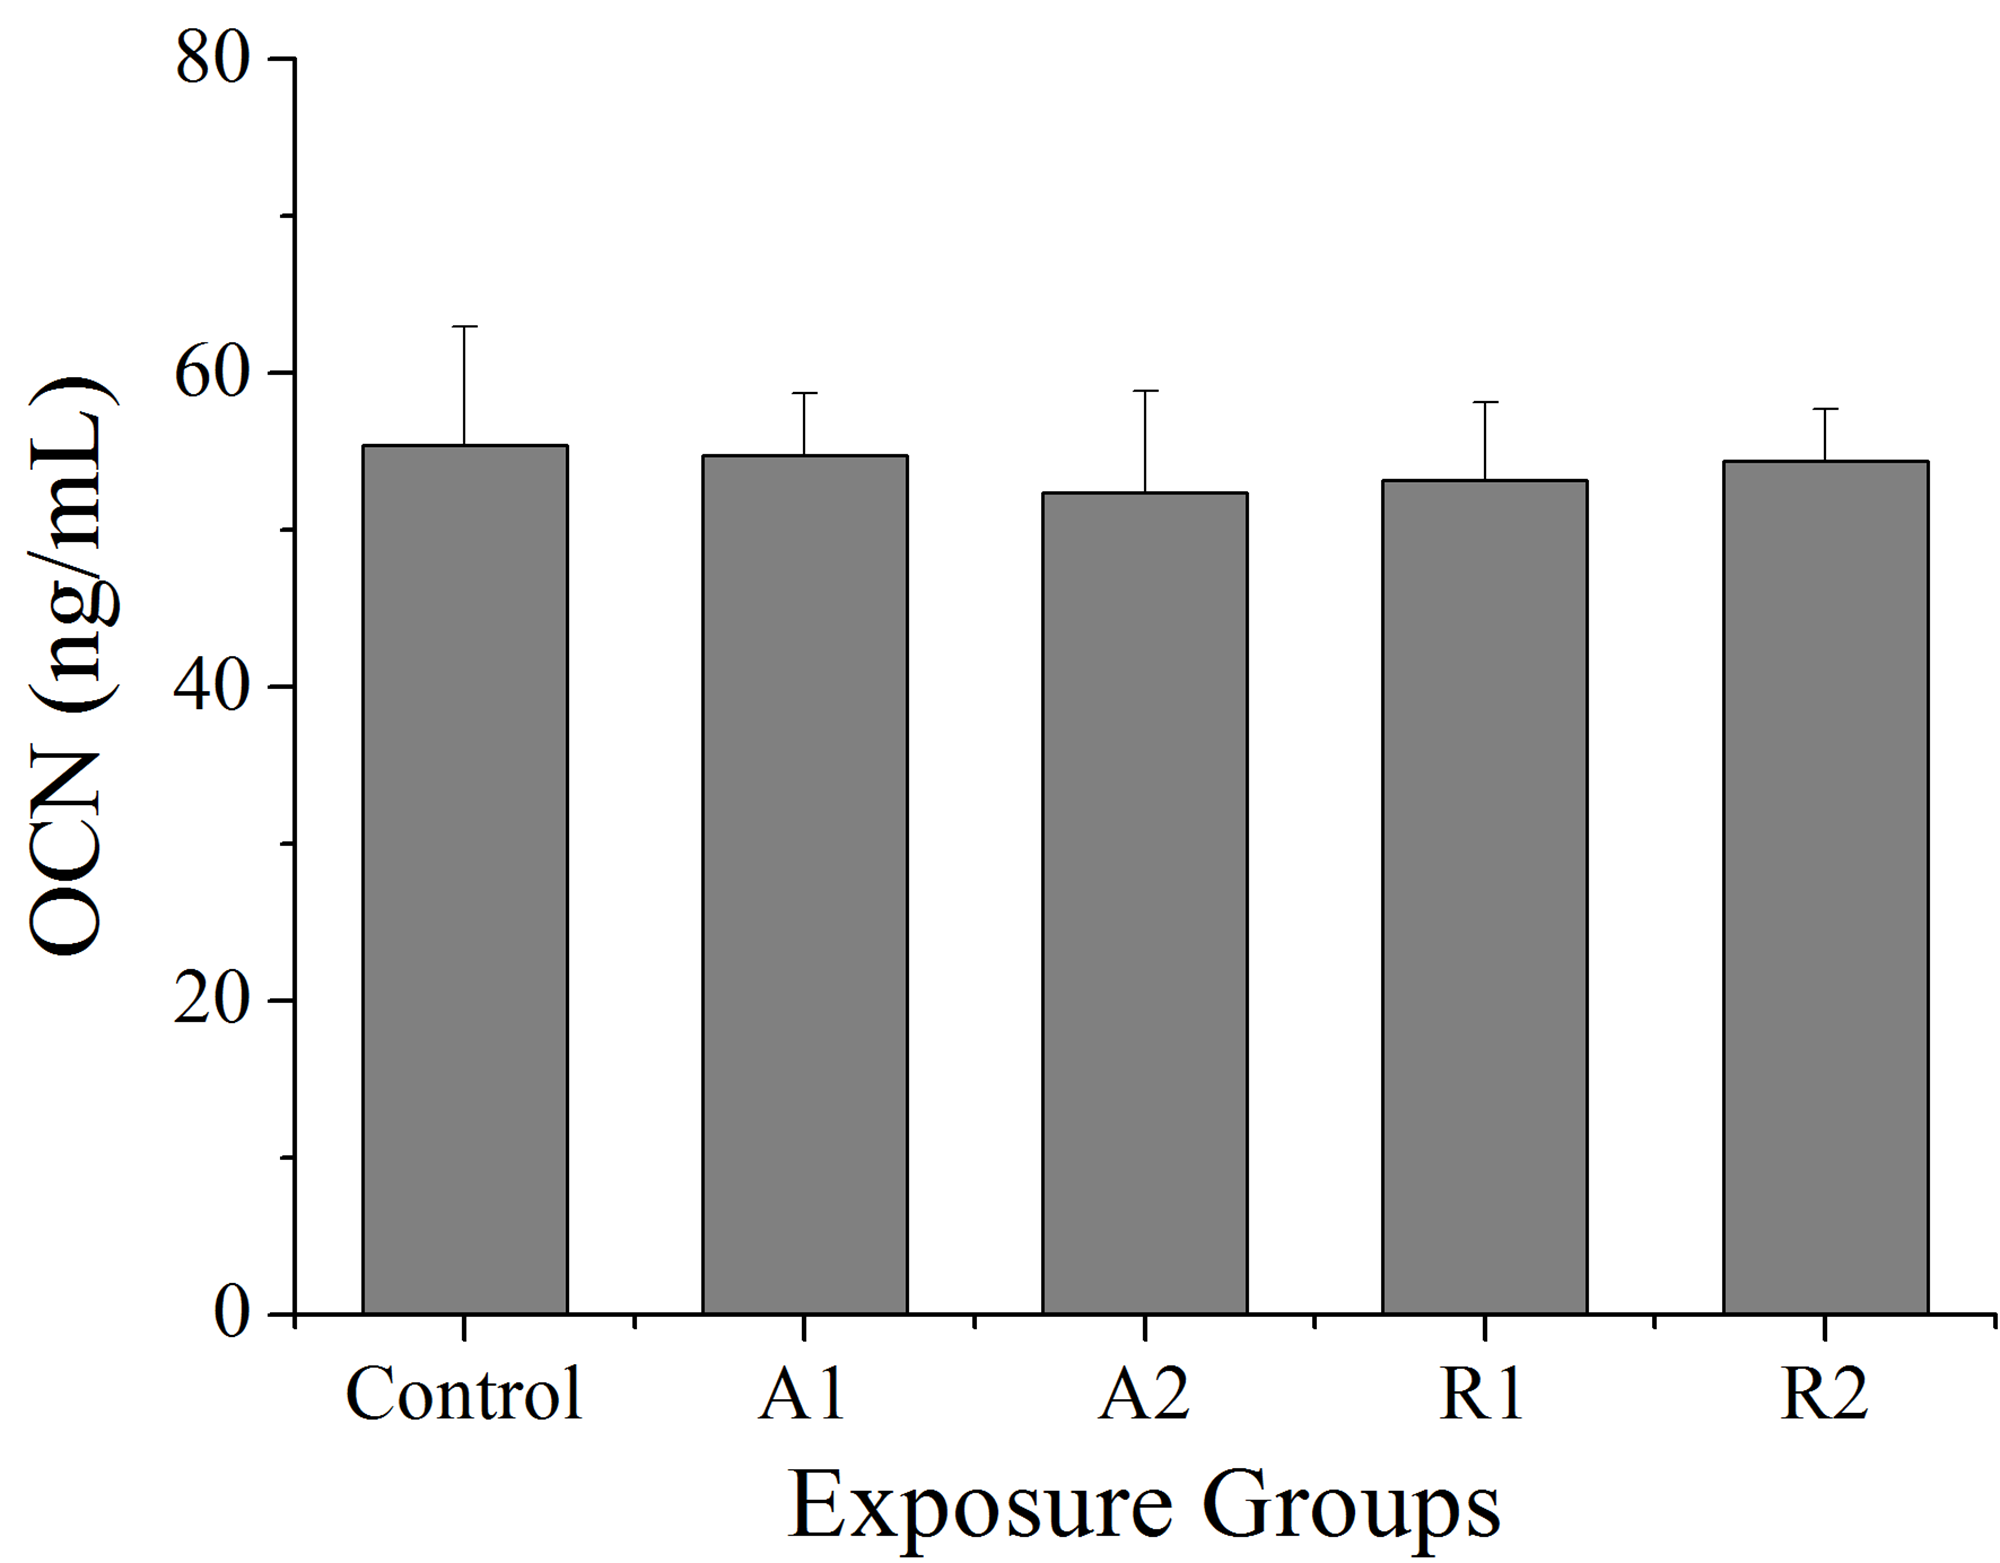

Supplement: f1 [file 8887323.f1.zip › 8887323.f3.tif]
